# Supplementary material for: Comparison of FECPAKG2, a modified Mini-FLOTAC technique and combined sedimentation and flotation for the coproscopic examination of helminth eggs in horses
Source: PubMed Central journal article supplement (PMC9097362; doi:10.1186/s13071-022-05266-y), 2022-05-12
Supplement: 13071_2022_5266_MOESM3_ESM.pdf [file 13071_2022_5266_MOESM3_ESM.pdf]

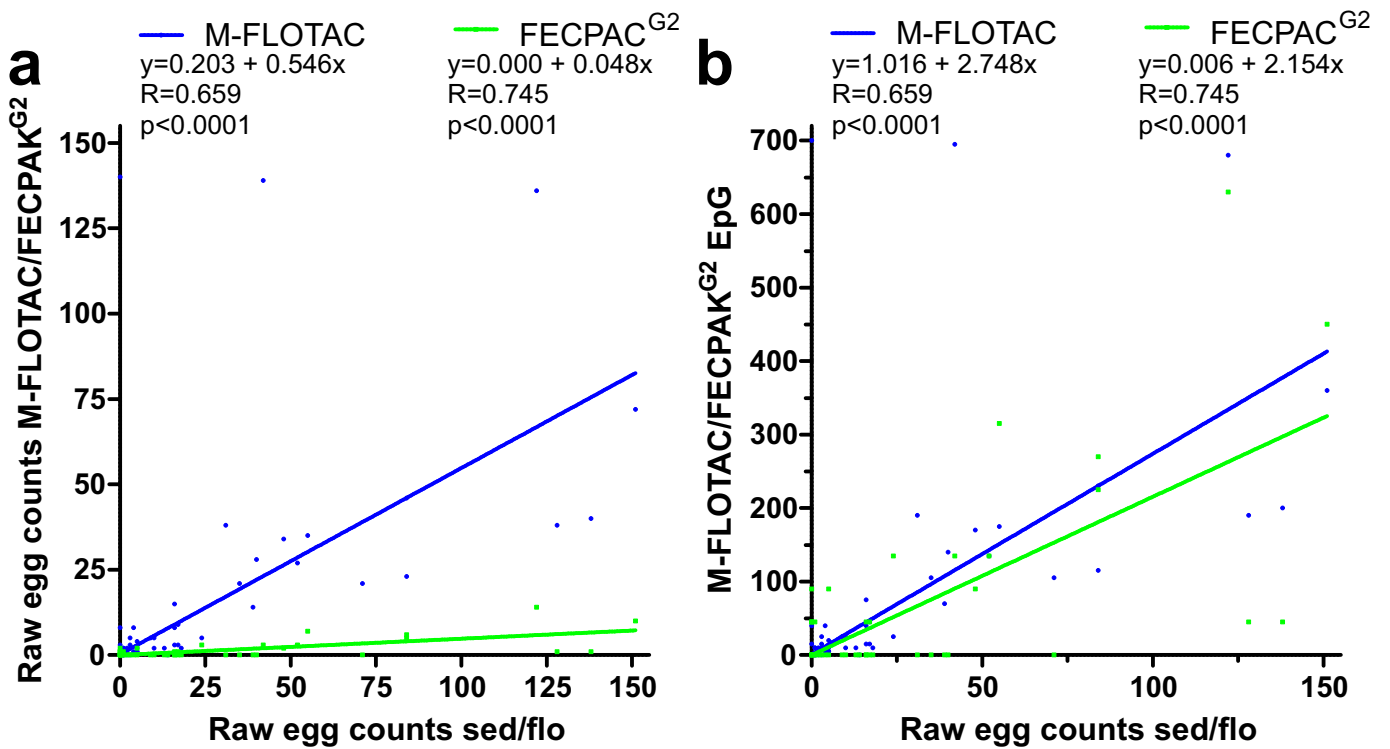

**Additional File 3: Figure S2** Pearson correlation between raw strongyle egg counts in sedimentation/flotation and results of the quantitative methods Mini-FLOTAC (M-FLOTAC) and FECPAK<sup>G2</sup>. Only data with raw egg counts in sedimentation/flotation < 200 were included since for higher numbers no exact egg counts were available for sedimentation/flotation. Data from Mini-FLOTAC and FECPAK<sup>G2</sup> were either shown as raw counts (a) or as eggs per gram faeces (b). Dots and regression curves for Mini-FLOTAC and FECPAK<sup>G2</sup> are shown in blue and green, respectively. Linear regression equations, correlation coefficients and p-values (comparison to a slope of zero) are provided above the plots.
