# Supplementary material for: Comparison of FECPAKG2, a modified Mini-FLOTAC technique and combined sedimentation and flotation for the coproscopic examination of helminth eggs in horses
Source: PubMed Central journal article supplement (PMC9097362; doi:10.1186/s13071-022-05266-y), 2022-05-12
Supplement: 13071_2022_5266_MOESM4_ESM.pdf [file 13071_2022_5266_MOESM4_ESM.pdf]

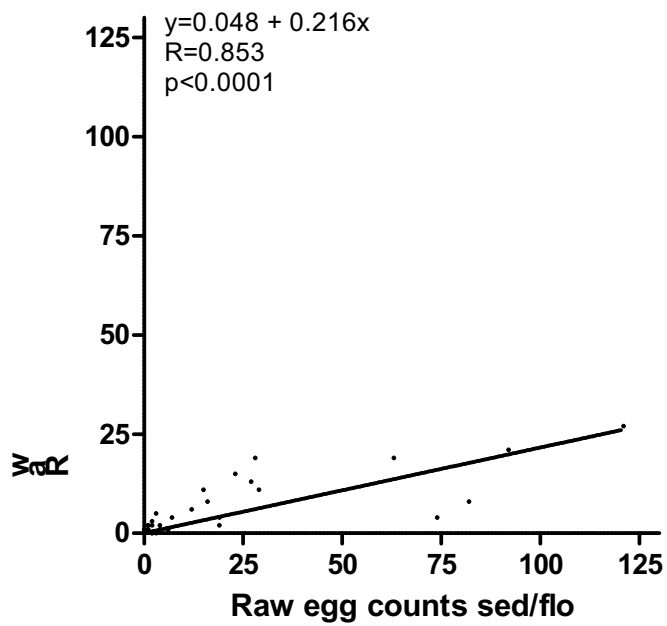

**Additional file 4: Figure S3** Pearson correlation between Anoplocephalidae raw egg counts obtained using sedimentation/flotation and Mini-FLOTAC (M-FLOTAC) methods. Linear regression equations, correlation coefficients and p-values (comparison to a zero slope) are provided above the plots.
